# Supplementary material
Source: PubMed Central journal article supplement (PMC6454539)
Supplement: cwy080_pandey_supplementary-revised.pdf [file cwy080_pandey_supplementary-revised.pdf]

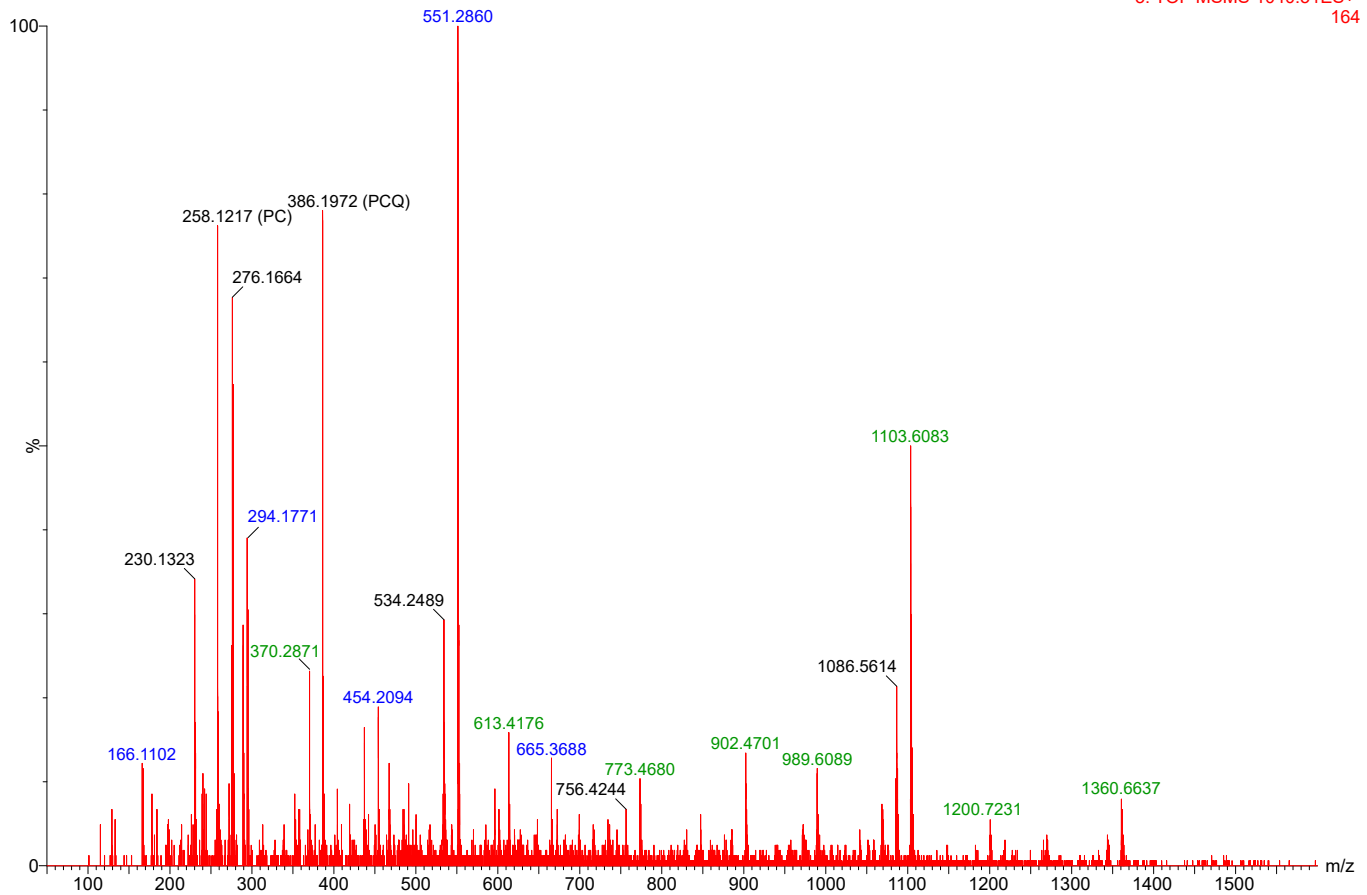

## EGF 16 KQINEC(Carbamidomethyl)ESNPC(Carbamidomethyl)QF

MH+1(mono)  
1653.6996

|                  | b  |         | y  |                 |
|------------------|----|---------|----|-----------------|
| ---              | 1  | K       | 13 | ---             |
| 257.1608         | 2  | Q       | 12 | 1525.6046       |
| <b>370.2449</b>  | 3  | I       | 11 | 1397.5460       |
| 484.2878         | 4  | N       | 10 | 1284.4620       |
| <b>613.3304</b>  | 5  | E       | 9  | 1170.4190       |
| <b>773.3610</b>  | 6  | C(Carb) | 8  | 1041.3764       |
| <b>902.4036</b>  | 7  | E       | 7  | 881.3458        |
| <b>989.4357</b>  | 8  | S       | 6  | 752.3032        |
| <b>1103.4786</b> | 9  | N       | 5  | <b>665.2712</b> |
| <b>1200.5314</b> | 10 | P       | 4  | <b>551.2282</b> |
| <b>1360.5620</b> | 11 | C(Carb) | 3  | <b>454.1755</b> |
| 1488.6206        | 12 | Q       | 2  | <b>294.1448</b> |
| ---              | 13 | F       | 1  | <b>166.0863</b> |

**Figure S1.** MS/MS fragmentation of a mass of 1040.51 at 20.16 min from the AspN digest of purified EGF16-20 expressed with hGXYLT1 and hXXYLT1, close to the theoretical mass of the EGF16 peptide with XylXylGlc modification (1040.42 Da 2+). Theoretical b- and y- ions of the EGF16 peptide are listed below and green and blue marked masses fit to observed masses. 258.1217 (PC) and 386.1972 (PCQ) correspond to two internal peptide fragments.

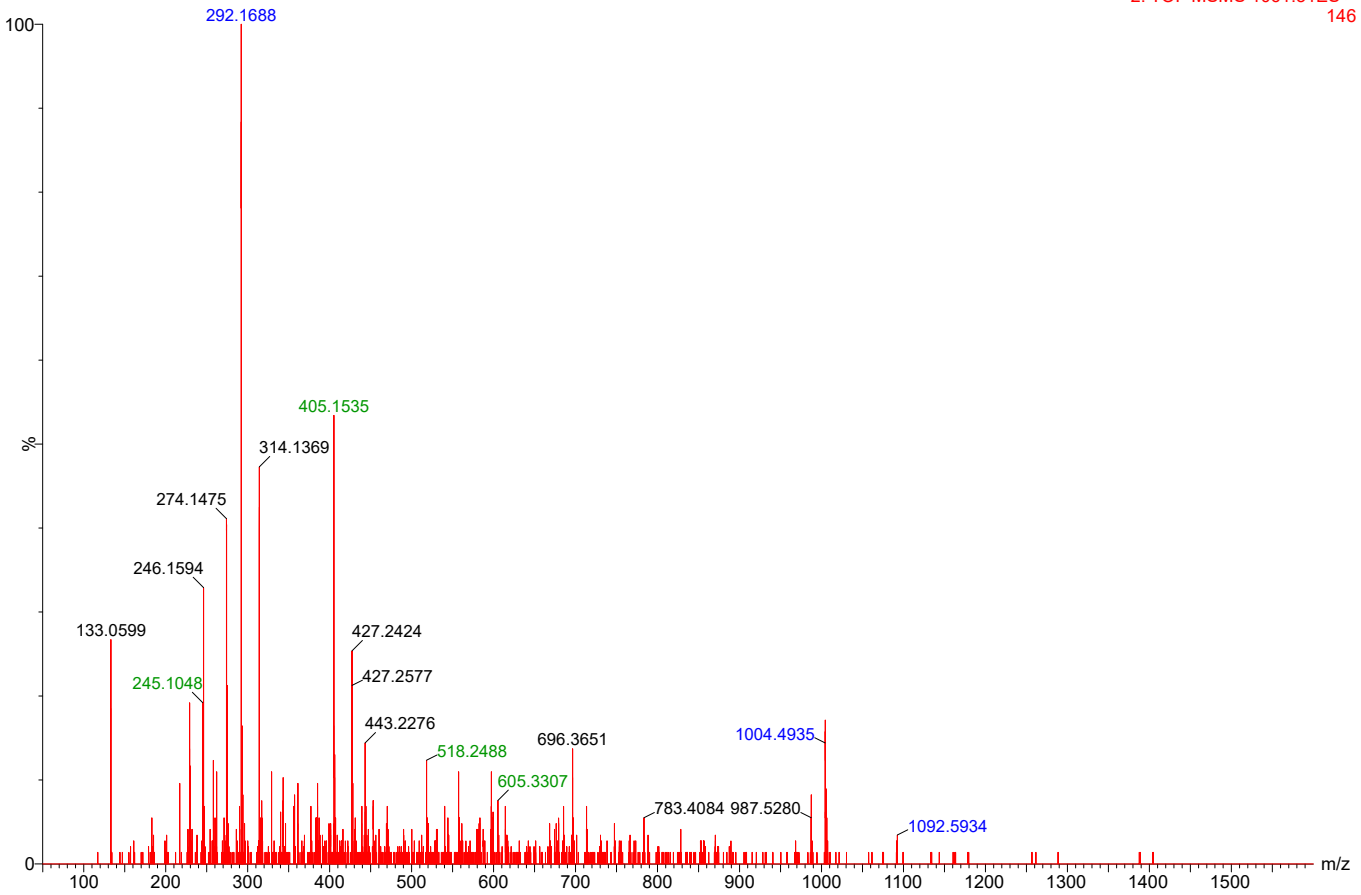

DEC(Carbamidomethyl)ISSPC(Carbamidomethyl)ANNGVC(Carbamidomethyl)I

MH+1(mono)  
1695.6771

| b               |    | y       |    |                  |
|-----------------|----|---------|----|------------------|
| ---             | 1  | D       | 15 | ---              |
| <b>245.0768</b> | 2  | E       | 14 | 1580.6502        |
| <b>405.1075</b> | 3  | C(Carb) | 13 | 1451.6076        |
| <b>518.1915</b> | 4  | I       | 12 | 1291.5769        |
| <b>605.2236</b> | 5  | S       | 11 | 1178.4929        |
| 692.2556        | 6  | S       | 10 | <b>1091.4608</b> |
| 789.3083        | 7  | P       | 9  | <b>1004.4288</b> |
| 949.3390        | 8  | C(Carb) | 8  | 907.3760         |
| 1020.3761       | 9  | A       | 7  | 747.3454         |
| 1134.4190       | 10 | N       | 6  | 676.3083         |
| 1248.4620       | 11 | N       | 5  | 562.2654         |
| 1305.4834       | 12 | G       | 4  | 448.2224         |
| 1404.5518       | 13 | V       | 3  | 391.2010         |
| 1564.5825       | 14 | C(Carb) | 2  | <b>292.1326</b>  |
| ---             | 15 | I       | 1  | 132.1019         |

**Figure S2.** MS/MS fragmentation of a mass of 1061.51 at 26.12 min from the AspN digest of purified EGF16-20 expressed with hGXYLT1 and hXXYLT1, close to the theoretical mass of the EGF18 peptide with XylXylGlc modification (1061.41 Da 2+). Theoretical b- and y- ions of the EGF18 peptide are listed below and green and blue marked masses fit to observed masses.

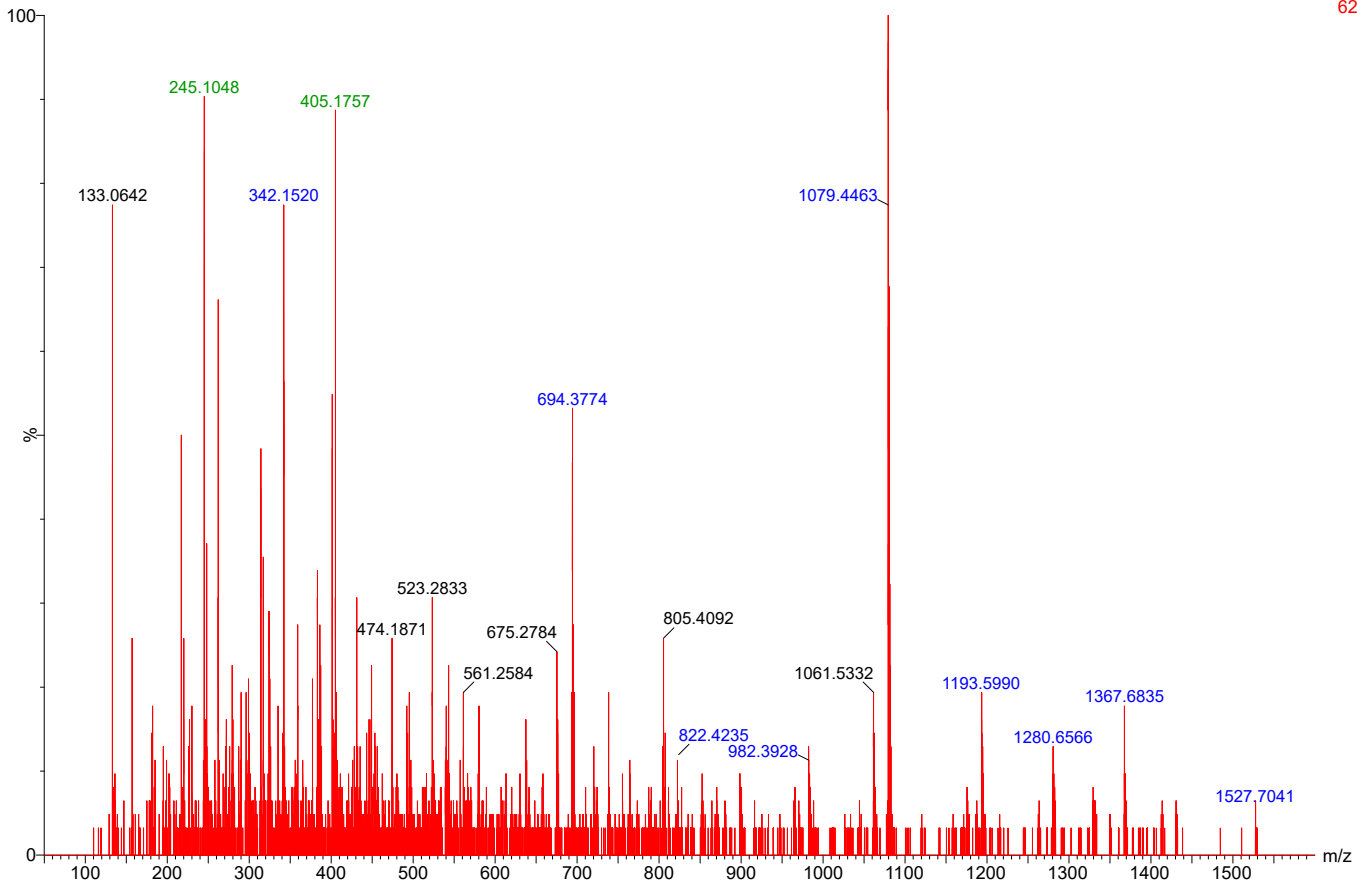

EGF 20 DEC(Carbamidomethyl)SSNPC(Carbamidomethyl)QHGGTC(Carbamidomethyl)Y  
MH+1(mono)  
1771.6105

| [               |    | b  |         | y  |                  |
|-----------------|----|----|---------|----|------------------|
| -               | -- | 1  | D       | 15 | ---              |
| <b>245.0768</b> |    | 2  | E       | 14 | 1656.5836        |
| <b>405.1075</b> |    | 3  | C(Carb) | 13 | <b>1527.5410</b> |
| 492.1395        |    | 4  | S       | 12 | <b>1367.5103</b> |
| 579.1715        |    | 5  | S       | 11 | <b>1280.4783</b> |
| 693.2144        |    | 6  | N       | 10 | <b>1193.4463</b> |
| 790.2672        |    | 7  | P       | 9  | <b>1079.4033</b> |
| 950.2979        |    | 8  | C(Carb) | 8  | <b>982.3506</b>  |
| 1078.3564       |    | 9  | Q       | 7  | <b>822.3199</b>  |
| 1215.4153       |    | 10 | H       | 6  | <b>694.2613</b>  |
| 1272.4368       |    | 11 | G       | 5  | 557.2024         |
| 1329.4583       |    | 12 | G       | 4  | 500.1810         |
| 1430.5060       |    | 13 | T       | 3  | 443.1595         |
| 1590.5366       |    | 14 | C(Carb) | 2  | <b>342.1118</b>  |
| -               | -- | 15 | Y       | 1  | 182.0812         |

**Figure S3.** MS/MS fragmentation of a mass of 1172.47 at 18.59 min from the AspN digest of purified EGF16-20 expressed with hGXYLT1 and hXXYLT1, close to the theoretical mass of the EGF 20 peptide with XylXylGlc modification and an additional fucose (1172.40 Da 2+). Theoretical b- and y- ions of the EGF20 peptide are listed below and green and blue marked masses fit to observed masses.

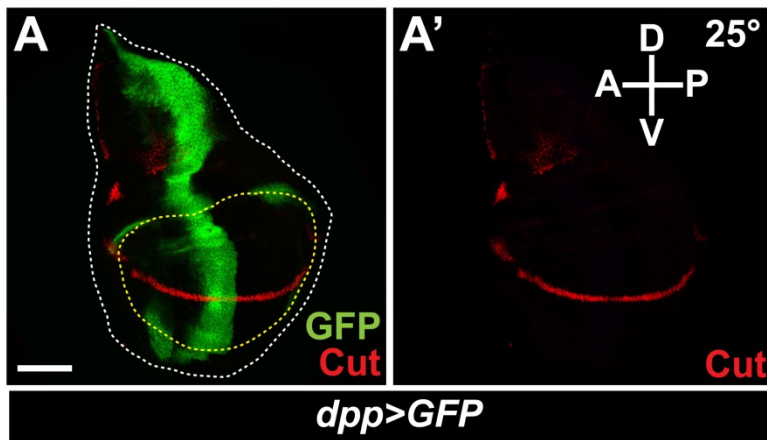

**Figure S4.** Dpp-expression domain and Cut expression at dorsal-ventral boundary in a wild-type third instar wing imaginal disc. (A-A') Third instar wing imaginal discs from larvae raised at 25°C. Staining with  $\alpha$ -Cut is shown in red. Green indicates *dpp>GFP*. Anterior is to the left, and dorsal is up. Scale bar is 50  $\mu$ m.
